# Supplementary material
Source: publisher site journal article supplement (https://www.dovepress.com/article/568638)
Supplement: Supplementary file 1 [file 568638%20Revised%20Supplementary%20Information_1.docx]

**Supplementary Materials**

**Table S1.** Search strategy in PubMed

| **Step** | **Query** |
| --- | --- |
| #1 | "Breast neoplasms"[MeSH Terms] OR "breast cancer"[Title/Abstract] OR "breast carcinoma"[Title/Abstract] OR "breast tumor"[Title/Abstract] OR "breast malignancy"[Title/Abstract] |
| #2 | "Antineoplastic agents"[MeSH Terms] OR "chemotherapy, adjuvant"[MeSH Terms] OR "neoadjuvant therapy"[MeSH Terms] OR "chemotherapy"[Title/Abstract] OR "chemo*"[Title/Abstract] OR "antineoplastic therapy"[Title/Abstract] |
| #3 | "Signs and symptoms"[MeSH Terms] OR "symptom assessment"[MeSH Terms] OR "symptom*"[Title/Abstract] OR "side effect*"[Title/Abstract] OR "adverse event*"[Title/Abstract] OR "toxicity"[Title/Abstract] OR OR "mental health"[Title/Abstract] OR "hair loss"[Title/Abstract] OR "alopecia"[Title/Abstract] "fatigue"[Title/Abstract] OR "nausea"[Title/Abstract] OR "vomiting"[Title/Abstract] OR "pain"[Title/Abstract] OR "neuropathy"[Title/Abstract] OR "cardiotoxicity"[Title/Abstract] OR "cognitive impairment"[Title/Abstract] OR "anxiety"[Title/Abstract] OR "depression"[Title/Abstract] OR "constipation"[Title/Abstract] OR "sweating"[Title/Abstract] OR "nervous"[Title/Abstract] OR " cardiotoxicity"[Title/Abstract] OR " insomnia"[Title/Abstract] OR " peripheral neuropathy"[Title/Abstract] |
| #4 | "Risk factors"[MeSH Terms] OR "causality"[MeSH Terms] OR "factor*"[Title/Abstract] OR "predictor*"[Title/Abstract] OR "association*"[Title/Abstract] OR "determinant*"[Title/Abstract] OR "demographic*"[Title/Abstract] OR "clinical factor*"[Title/Abstract] OR "psychosocial factor*"[Title/Abstract] OR "comorbidit*"[Title/Abstract] |
| #5 | "pre-treatment"[Title/Abstract] OR "before treatment"[Title/Abstract] OR "during treatment"[Title/Abstract] OR "post-treatment"[Title/Abstract] OR "survivorship"[Title/Abstract] OR "pre-chemotherapy"[Title/Abstract] OR "during chemotherapy"[Title/Abstract] OR "post-chemotherapy"[Title/Abstract] |
| #6 | "Observational study"[Publication Type] OR "cohort studies"[MeSH Terms] OR "cross-sectional studies"[MeSH Terms] OR "case-control studies"[MeSH Terms] OR "observational"[Title/Abstract] OR "cohort"[Title/Abstract] OR "cross-sectional"[Title/Abstract] OR "case-control"[Title/Abstract] |
| #7 | 2015/01/01:2025/09/08[Date - Completion] |
| #8 | #1 AND #2 AND #3 AND #4 AND #5 AND #6 AND #7 |

**Table S2** Checklist for assessing the quality of included studies

| Item | Description of item | Item utilized in critical appraisal |
| --- | --- | --- |
| 1 | Research questions or objectives are sufficiently described | Yes |
| 2 | Study design is evident and appropriate | Yes |
| 3 | Method of subject / comparison group selection or source of information / input variables are described and appropriate | Yes |
| 4 | Subject characteristics are sufficiently described | Yes |
| 5 | Procedures of random allocation are described | N/A |
| 6 | Procedures of blinding the investigators are described | N/A |
| 7 | Procedures of blinding the subjects are described | N/A |
| 8 | Outcome and exposure measures are well defined and robust to measurement or misclassification bias, and means of outcome assessment are described | Yes |
| 9 | Sample size utilized in the study is appropriate | N/A |
| 10 | Analytical methods employed are justified and appropriate | Yes |
| 11 | Estimates of variance are reported in the results section | Yes |
| 12 | Confounding factors are controlled for | Partial |
| 13 | Results are reported in sufficient detail | Yes |
| 14 | Conclusions drawn are supported by the results | Yes |

N/A: only applicable to studies with a randomized controlled trial design.

Partial: applicable to a partial of cohort study.
